# Supplementary material for: Central Himalayan tree-ring isotopes reveal increasing regional heterogeneity and enhancement in ice mass loss since the 1960s
Source: Copernicus journal article supplement (doi:10.5194/tc-15-95-2021), 2021-01-06
Supplement: Supplementary file 1 [file tc-15-95-2021-supplement.pdf]

Supplement of The Cryosphere, 15, 95–112, 2021  
<https://doi.org/10.5194/tc-15-95-2021-supplement>  
© Author(s) 2021. This work is distributed under  
the Creative Commons Attribution 4.0 License.

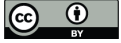

*Supplement of*

## **Central Himalayan tree-ring isotopes reveal increasing regional heterogeneity and enhancement in ice mass loss since the 1960s**

**Nilendu Singh et al.**

*Correspondence to:* Achim Bräuning ([achim.braeuning@fau.de](mailto:achim.braeuning@fau.de))

The copyright of individual parts of the supplement might differ from the CC BY 4.0 License.

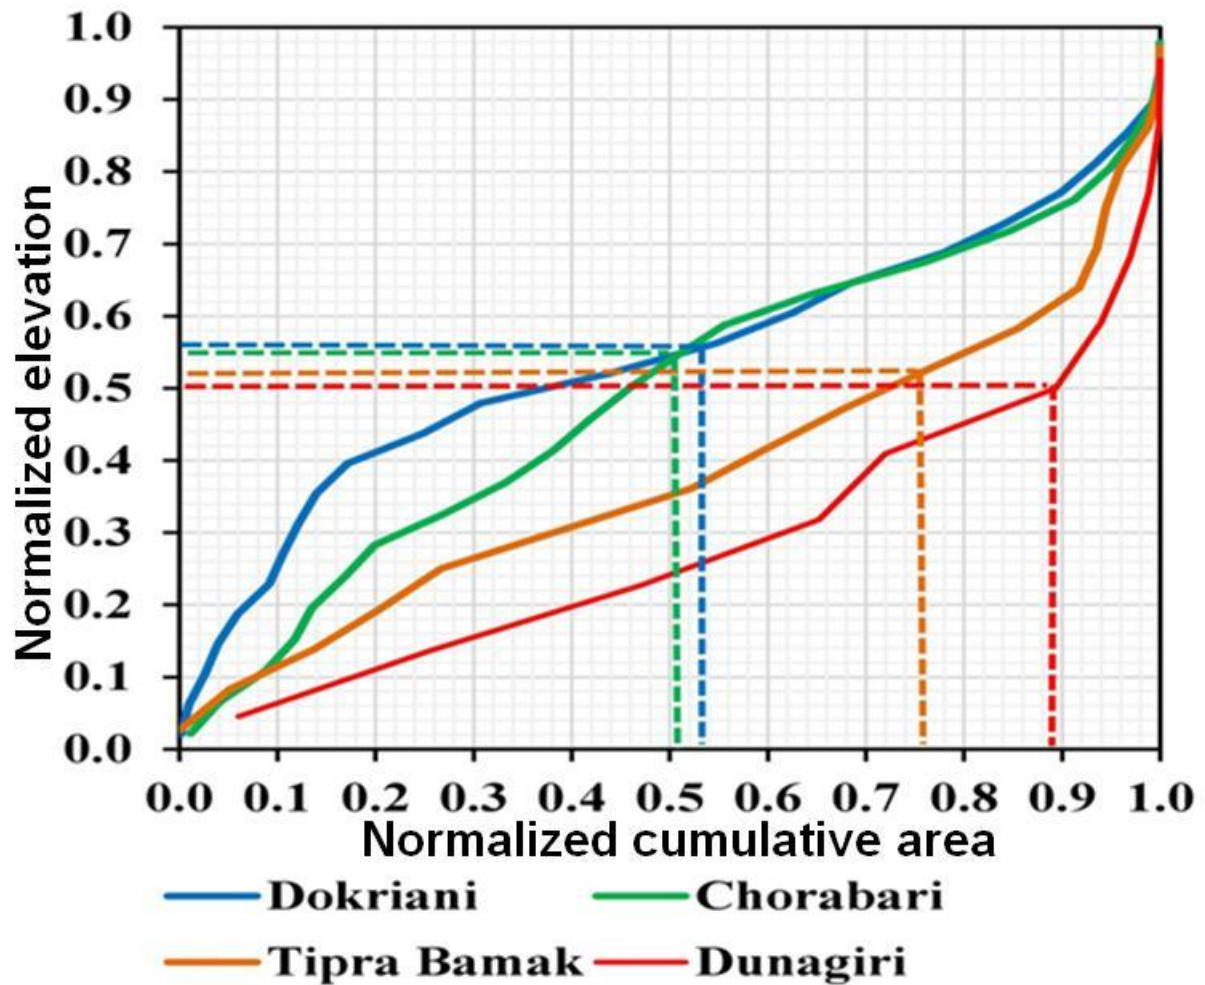

**Figure S1. Glacier hypsometry of four benchmark glaciers** (Dokriani: DOK; Chorabari: CHO; Tipra Bamak: TIP; and Dunagiri: DUN) of the Ganga Basin/WCH. The curve is convex for the DOK and CHO glaciers, while it was concave for the TIP and DUN glaciers. The dashed lines for each glacier were assigned the same colour as their corresponding hypsometric curve. The horizontal dashed lines are showing normalized snow line altitude (SLA) for each individual glacier while vertical lines indicate area at elevation similar to SLA. Hypsometric curves of these four glaciers are representative of the glaciers found in the central Himalaya (Garg et al., 2017).

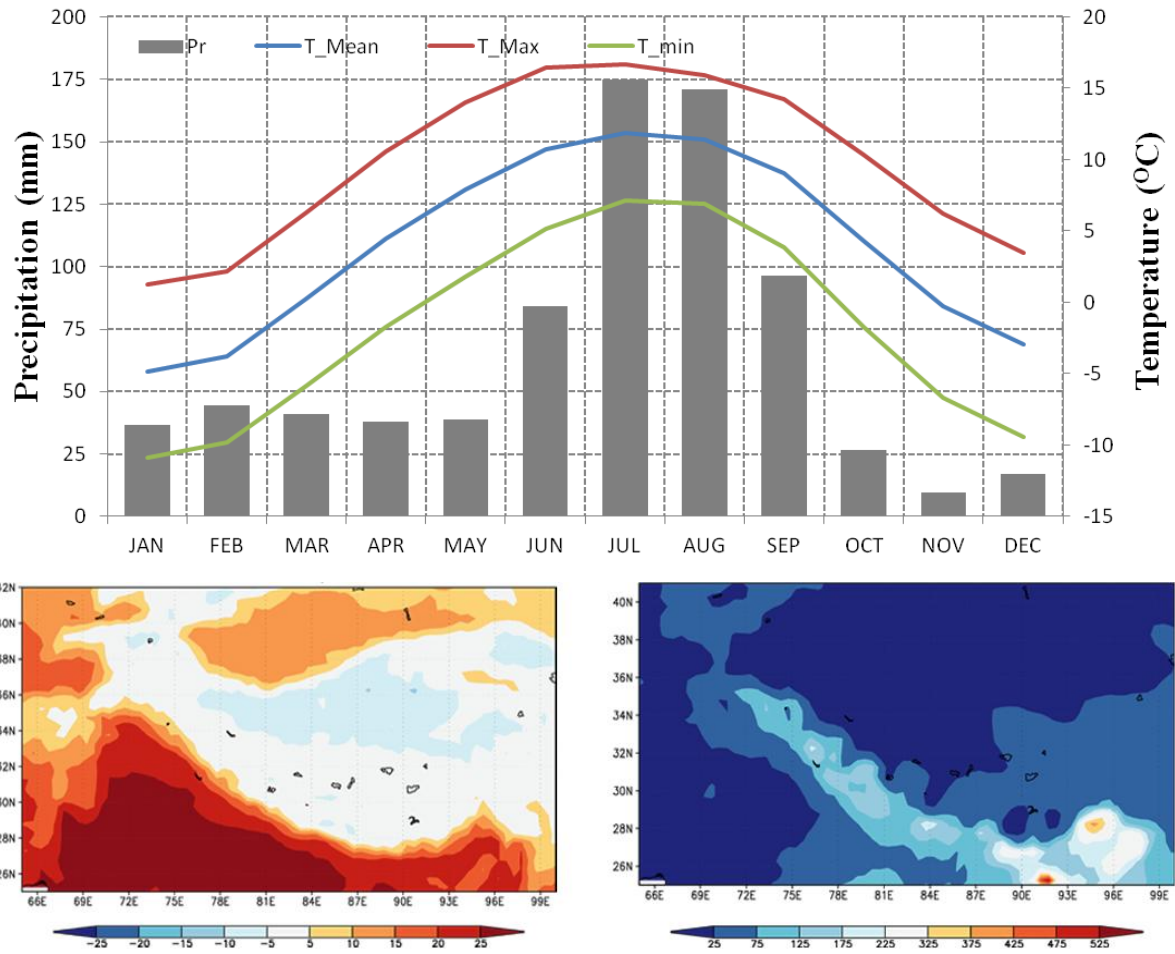

**Figure S2. Regional climatology.** Upper panel: Annual mean meteorological condition in our study region ( $30.15^{\circ}$  to  $31.03^{\circ}$  N and  $78.78^{\circ}$  to  $80.73^{\circ}$  E) as derived from regional meteorological stations and reanalysis dataset (CRU-TS 4.01, 1901-2016; scale:  $2.5^{\circ}$ ). (Pr: precipitation; T\_Mean: mean temperature; T\_Max: Maximum temperature; T\_Min: Minimum temperature). Lower panel: Spatial trend of mean annual temperature ( $^{\circ}$ C) and mean annual precipitation (mm) (CRU-TS 4.01, 1901-2016).

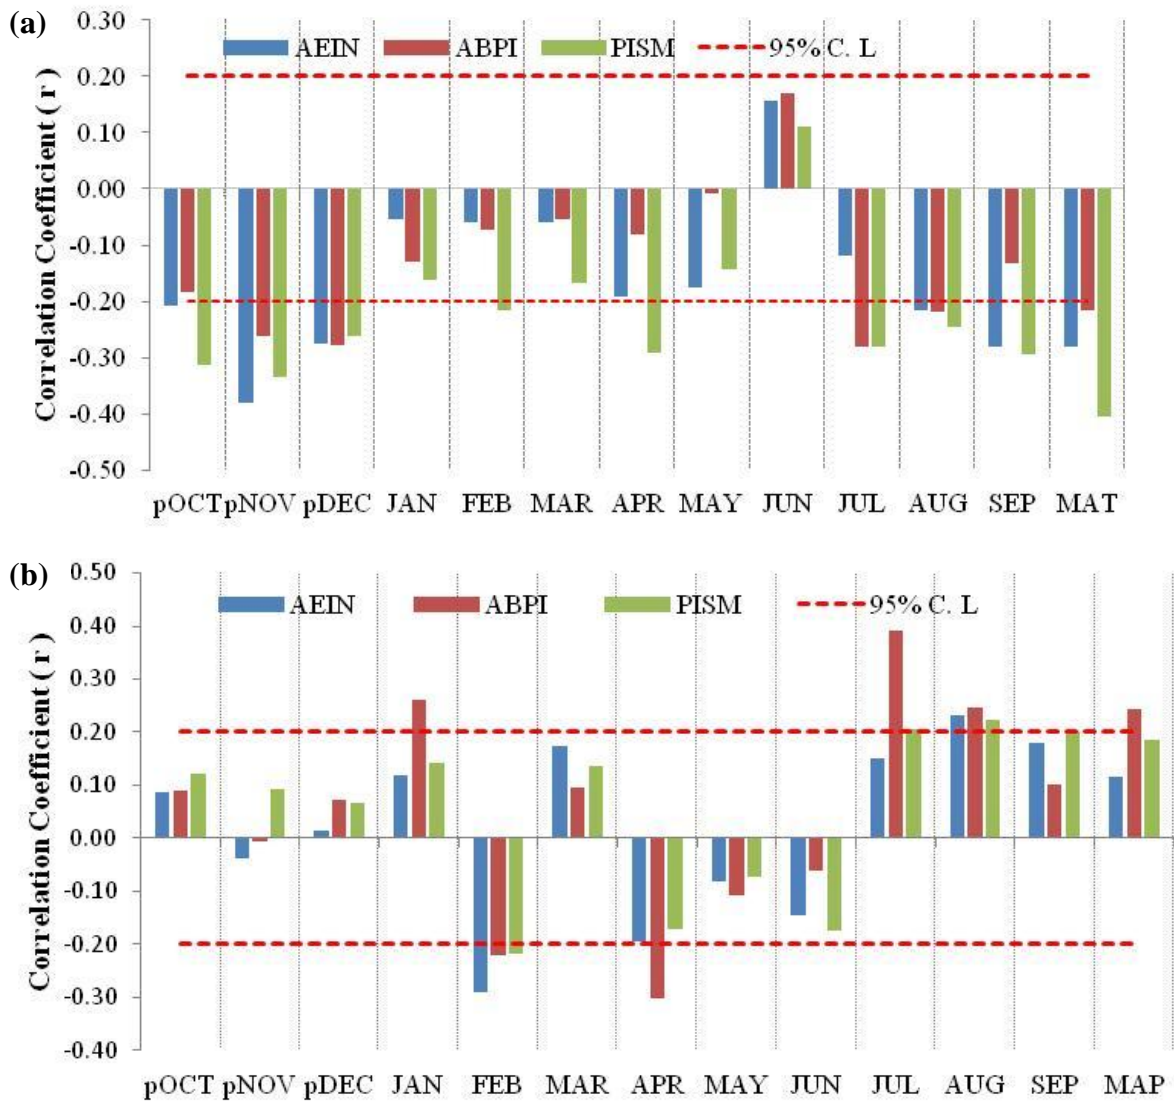

**Figure S3. Climate-response function.** Correlations between  $\delta^{13}\text{C}$  chronologies with (a) mean monthly temperature; and (b) total monthly precipitation. Blue, Red and Green bars represent the correlations value with *Abies pindrow* (ABPI), *Picea smithiana* (PISM), and *Aesculus indica* (AEIN). The red dotted horizontal line indicates the 95% confidence level. Prefix 'p' before the months denotes the months of the previous growth year.

(a)

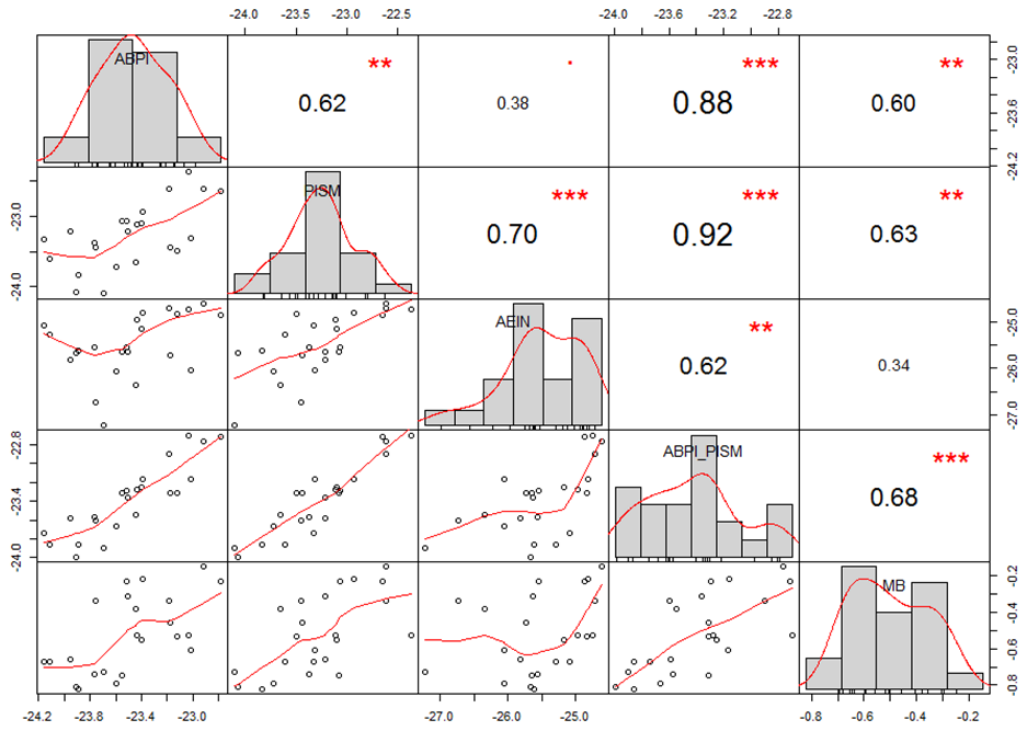

(b)

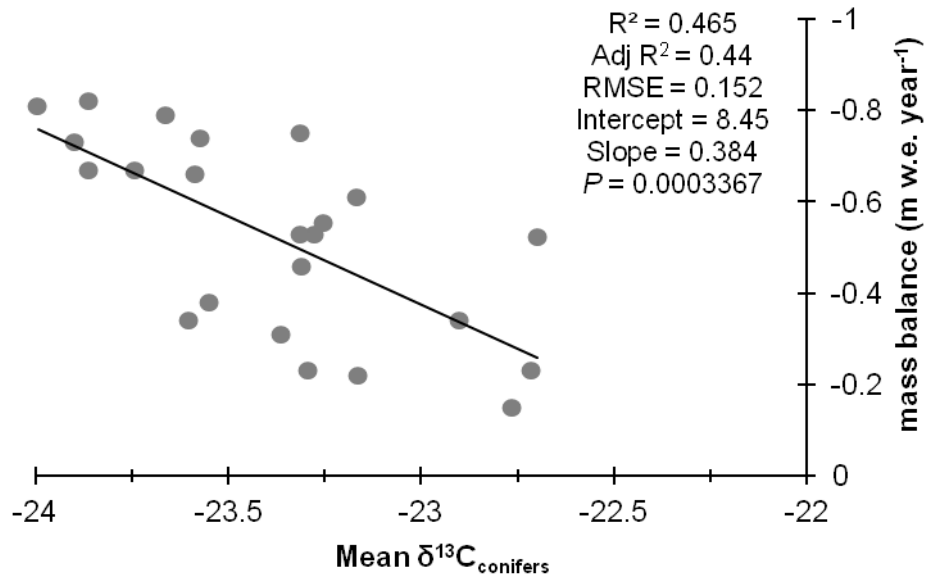

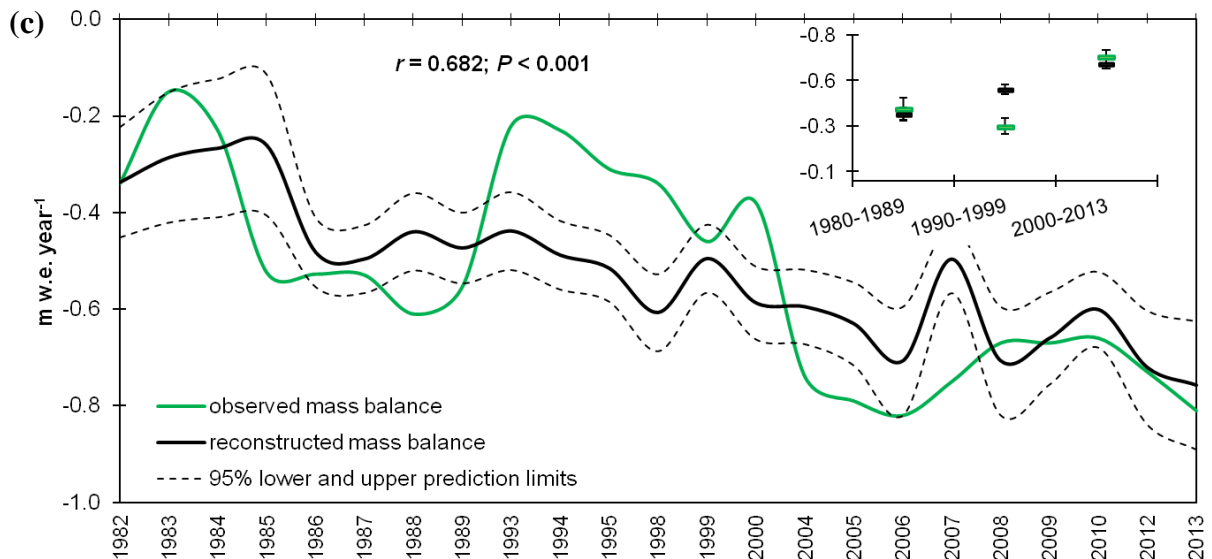

**Figure S4. Correlation matrix of species  $\delta^{13}\text{C}$  chronologies and mass balance** (a) The correlation matrix and pair plots of  $\delta^{13}\text{C}$  chronologies of conifers (*Abies pindrow*: ABPI; *Picea smithiana*: PISM), broadleaf deciduous (*Aesculus indica*: AEIN) and Mass Balance (MB). The distribution of each variable is shown on the diagonal. On the bottom of the diagonal bivariate scatter plots with a fitted line are displayed and on the top value of the correlation plus the significance levels have been indicated ( $p$ -values: 0.01\*; 0.05\*\*; 0.001\*\*\*). (b) Scatter plot of mean  $\delta^{13}\text{C}$  chronology of conifers (ABPI-PISM) and MB with a linear relationship highlighted for 23 years: 1982-2013 (having gap years of: 1990-1992, 1996, 1997, 2001-2003 and 2011). (c) Comparison plot of observed and reconstructed mass balance. Inset plot indicates decadal coherence. Low coherence in the 1990s could be ascribed to relative gap in *in-situ* mass balance measurements.



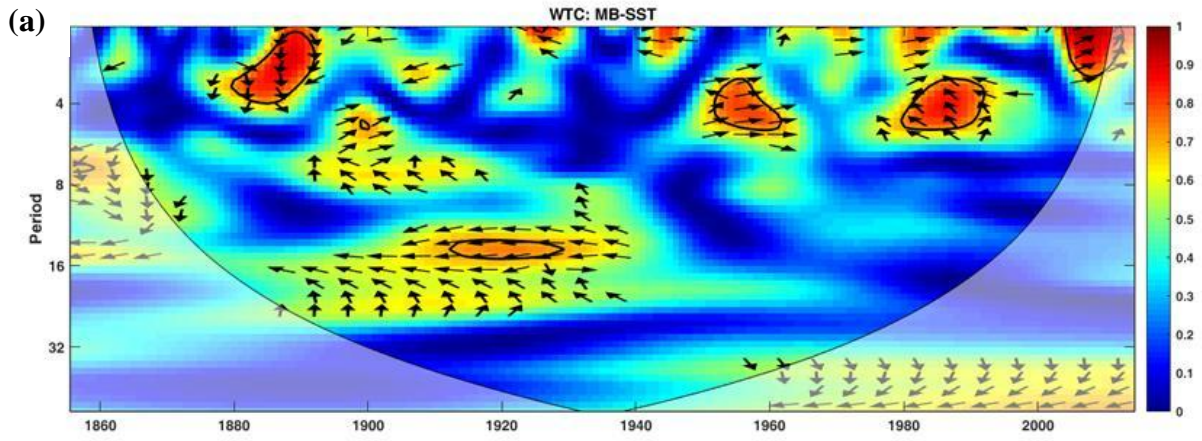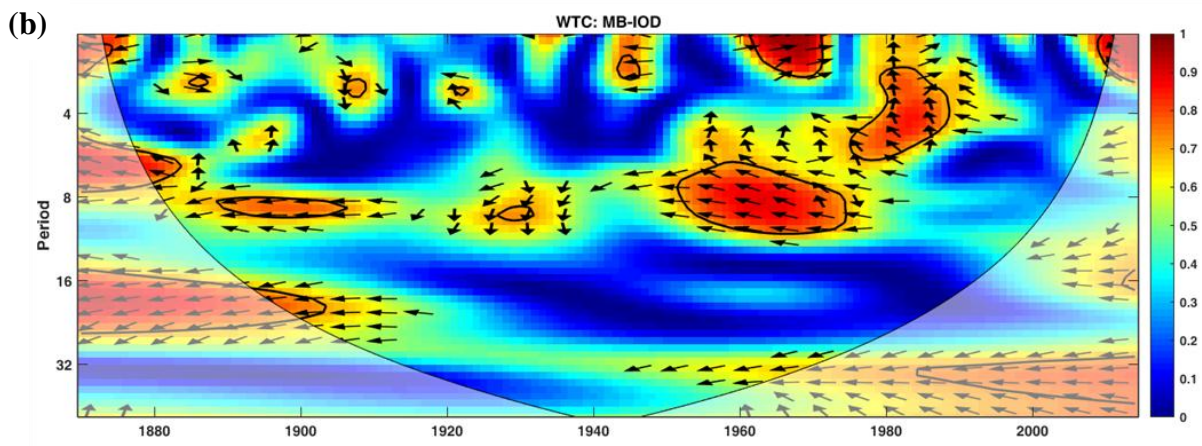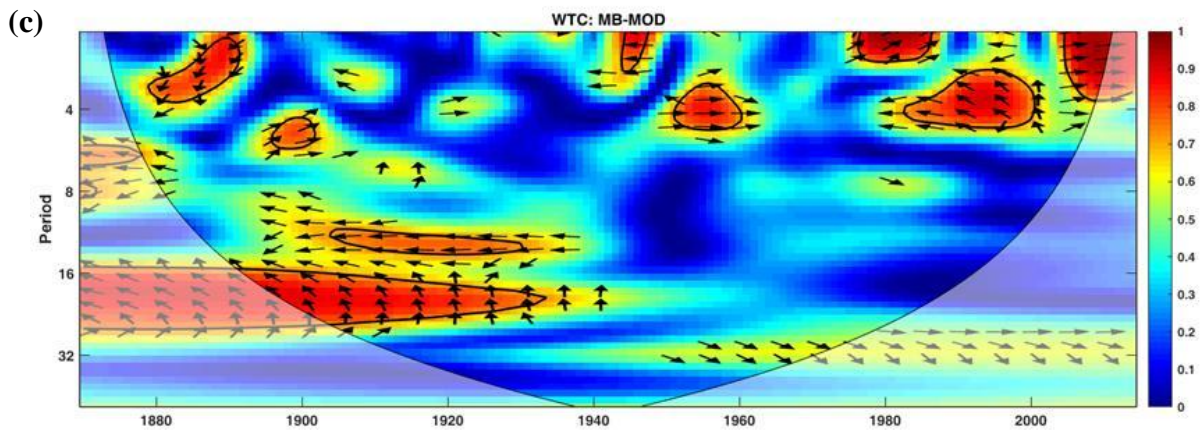

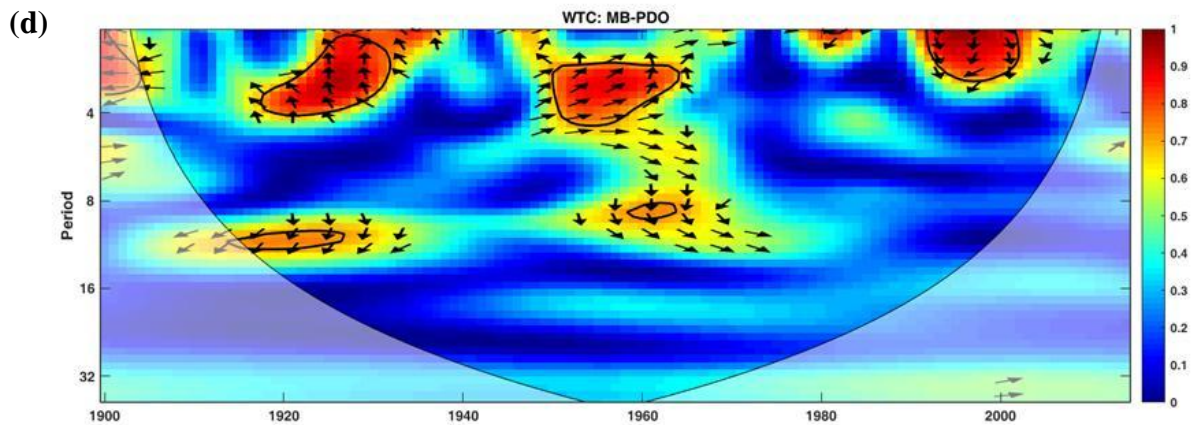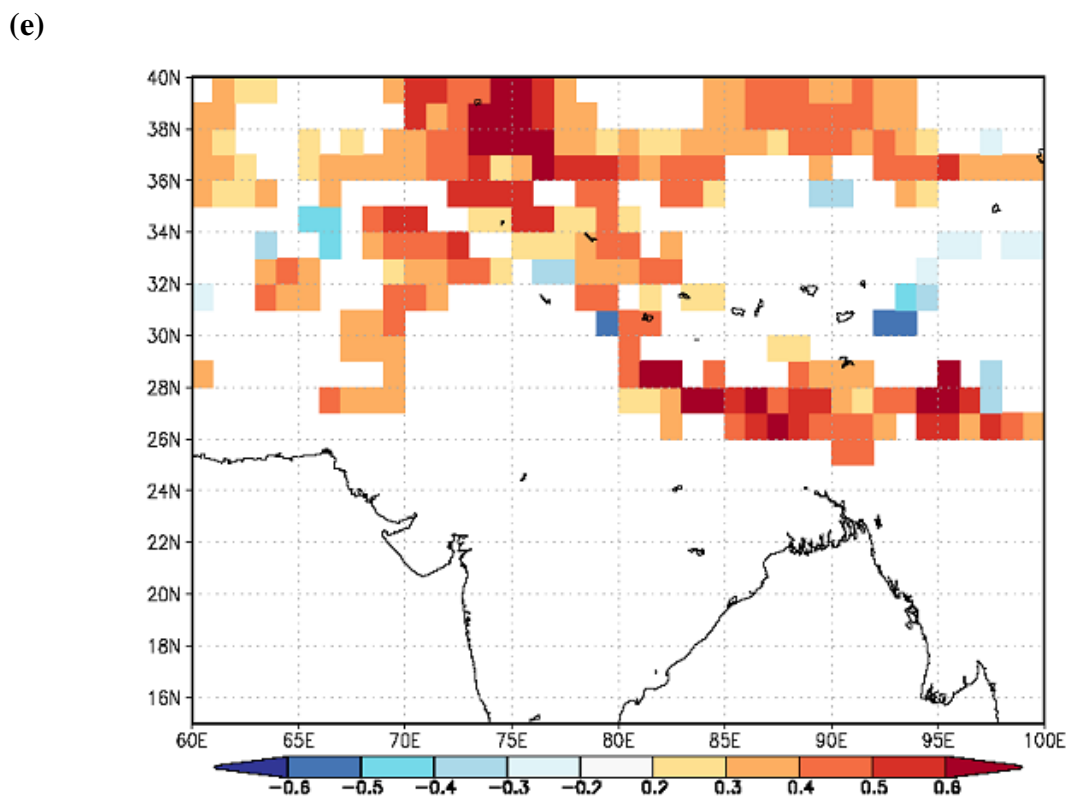

**Figure S5. Climate and mass balance coherence analyses.** Squared wavelet coherence between the standardized mass balance (MB) time series and (a) Nino4 SST, (b) Indian Ocean Dipole (IOD), (c) ENSO Modoki (MOD), and (d) Pacific Decadal Oscillation (PDO). The 5% significance level against red noise is shown as a thick contour. The relative phase relationship is shown as arrows (with in-phase pointing right, anti-phase pointing left, and indices leading MB by  $90^\circ$  pointing straight down and vice versa). The observations indicate that the phase angles are variable across the scales and denote a variable time lag between MB and indices arising due to temporally variable signal propagation. Arrows pointing upwards suggest that SST slightly leads MB. However, high circular standard deviation indicates a high variability and fades any firm conclusion on a stronger SST-MB link. (e) Spatial correlation map between annual snow cover data (NOAA: 1966-2013) and reconstructed MB. The map is generated using the KNMI Climate Explorer (<http://climexp.knmi.nl>)



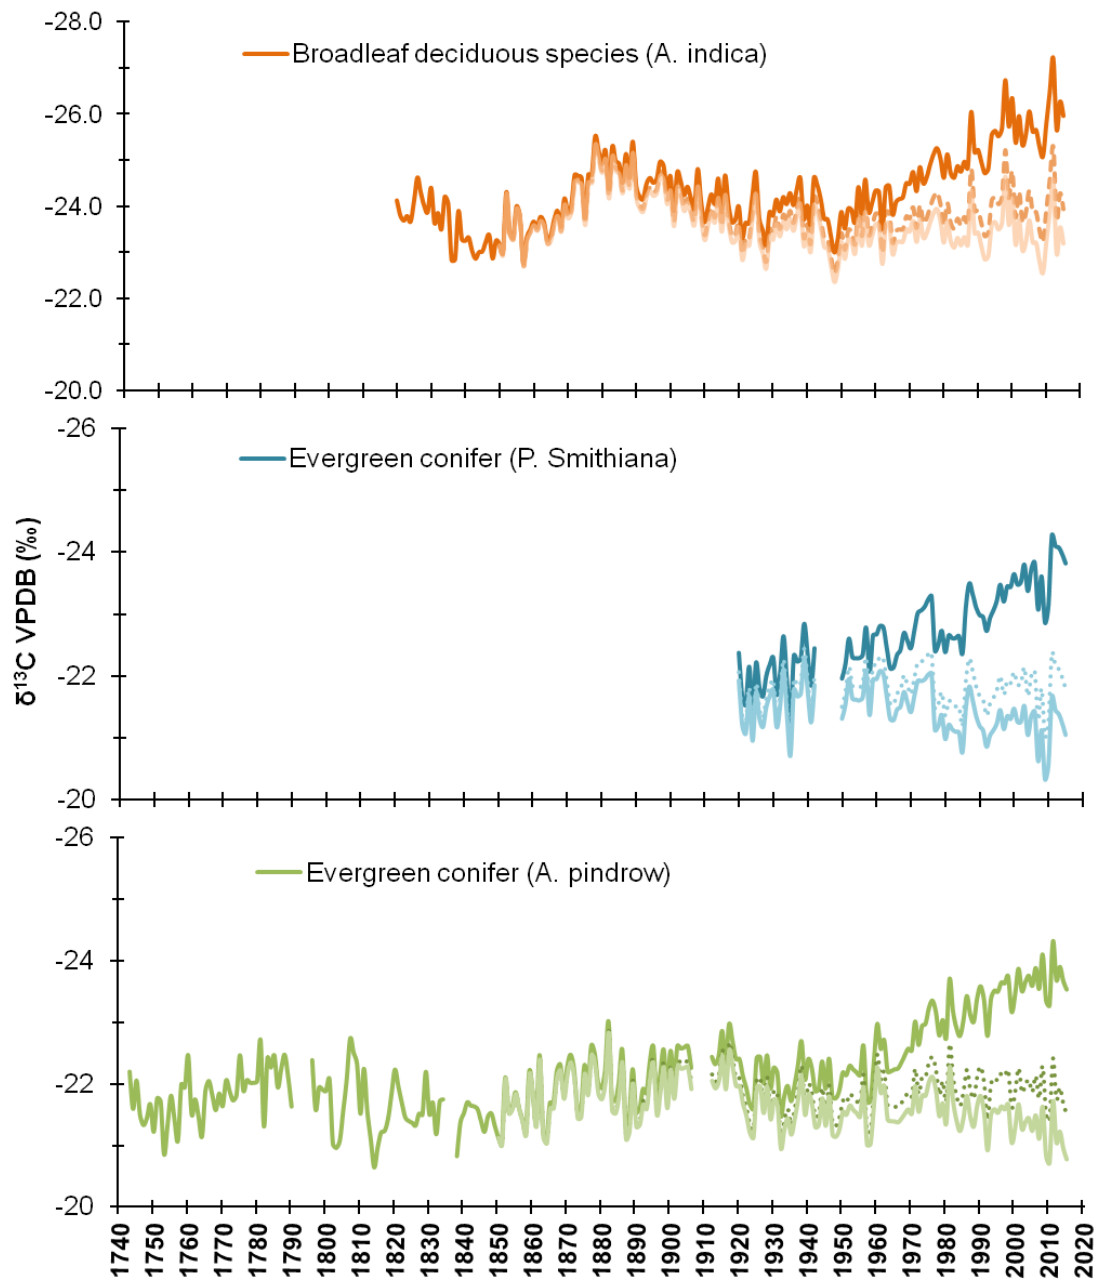

**Figure S6. Atmospheric CO<sub>2</sub> effect on species' δ<sup>13</sup>C chronologies.** Comparison of raw δ<sup>13</sup>C series (dark lines), δ<sup>13</sup>C series corrected for post-industrial changes in the isotopic composition of atmospheric CO<sub>2</sub> (dotted lines), and δ<sup>13</sup>C series after additional correction for the physiological responses to increasing concentrations of atmospheric CO<sub>2</sub> (bright lines) for the broad-leaf deciduous species (*Aesculus indica*), and for two evergreen conifer species (*Picea smithiana* and *Abies pindrow*).

**Table S1: Descriptive statistics of  $\delta^{13}\text{C}$  chronologies of three tree species from DOK glacier valley region**

|                                              | <i>Aesculus indica</i><br>(AEIN)         | <i>Abies pindrow</i><br>(ABPI) | <i>Picea smithiana</i><br>(PISM) |
|----------------------------------------------|------------------------------------------|--------------------------------|----------------------------------|
| Chronological years                          | 1820 - 2015<br>(196 yrs)                 | 1743 - 2015<br>(273 yrs)       | 1920 - 2015<br>(96 yrs)          |
| Mean $\pm$ Std. error (‰)                    | -24.31 $\pm$ 0.05                        | -22.19 $\pm$ 0.04              | -22.72 $\pm$ 0.06                |
| Std. deviation (‰)                           | 0.82                                     | 0.7                            | 0.65                             |
| Coefficient of variation<br>(%)              | 3.4                                      | 3.2                            | 2.8                              |
| First-order<br>autocorrelation               | 0.81                                     | 0.8                            | 0.86                             |
| Inter-tree correlation<br>(1976-2015)        | 0.5 - 0.83                               | 0.6 - 0.87                     | 0.62 - 0.83                      |
| Inter-species correlation<br>(common period) | 0.818<br>(AEIN - ABPI)                   | 0.843<br>(ABPI - PISM)         | 0.824<br>(PISM - AEIN)           |
| Annual phenology                             | Broadleaf deciduous<br>(April-September) | Evergreen<br>conifer           | Evergreen<br>conifer             |

**Table S2. Glacio-morphological characteristics of four benchmark glaciers in the central Himalaya, India (2015)**

| Sl. No. | Name of the Glacier | Lat/Longitude        | Area (km <sup>2</sup> ) | Length (km) | Debris covered area (%) | Altitudinal range (m asl) | Aspect | Observed mass balance period (gap year) | Mean mass balance (m w.e. yr <sup>-1</sup> ) | SLA (m asl) | Retreat (m/y) | Deglaciation (%) 1994-2015 | Mean slope (°) | AAR  | Velocity (m/yr) | Reference                                       |
|---------|---------------------|----------------------|-------------------------|-------------|-------------------------|---------------------------|--------|-----------------------------------------|----------------------------------------------|-------------|---------------|----------------------------|----------------|------|-----------------|-------------------------------------------------|
| 1.      | Chorabari (CHO)     | 30°74' N<br>79°09' E | 5.63                    | 7.2         | 25                      | 6034 - 3866               | N      | 2004 - 2013<br>(2011)                   | -0.73                                        | 3852        | 7.36 ± 2.45   | 3.60 ± 1.48                | 25.70          | 0.53 | 14.50           | Pratap et al., 2015; Garg et al. (2017), (2019) |
| 2.      | Dokriani (DOK)      | 30°50' N<br>78°50' E | 6.34                    | 5.77        | 15                      | 6120 - 3985               | NW     | 1993 - 2000<br>(1996- 1997)             | -0.32                                        | 3979        | 18.30 ± 2.49  | 2.46 ± 1.94                | 24.78          | 0.55 | 11.41           | Pratap et al., 2015; Garg et al. (2017), (2019) |
| 3.      | Dunagiri (DUN)      | 30°33' N<br>79°54' E | 2.25                    | 5.93        | 75                      | 5278 - 4374               | N      | 1985 - 1989                             | -1.04                                        | 4374        | 6.10 ± 2.45   | 3.48 ± 3.88                | 12.27          | 0.13 | --              | Pratap et al., 2015; Garg et al. (2017), (2019) |
| 4.      | Tipra Bamak (TIP)   | 30°44' N<br>79°41' E | 5.47                    | 7.48        | 55                      | 5422 - 3835               | NW     | 1982 - 1989                             | -0.14                                        | 3836        | 17.78 ± 2.45  | 4.20 ± 1.29                | 18.52          | 0.23 | 9.42            | Pratap et al., 2015; Garg et al. (2017), (2019) |

**Table S3. Statistics of calibration, and leave-one-out cross-validation (LOOCV) for annual mass balance reconstruction**

Model calibration statistics:  $r = + 0.6821$ ; R-squared: 0.4653; Adjusted R-squared: 0.4398; F-statistic: 18.28;  $P < 0.0001$ ; RMSE: 0.159; and DW: 1.17.

**leave-one-out cross-validation (LOOCV)**

|     | $r$     | $R^2$ | F        | Sign test (+/-)                 | PMT  | RMSE  | RE    | CE    | DW     |
|-----|---------|-------|----------|---------------------------------|------|-------|-------|-------|--------|
| GMB | 0.609** | 0.371 | 12.371** | 14 <sup>+</sup> /9 <sup>-</sup> | 4.01 | 0.166 | 0.364 | 0.364 | 1.21** |

$r$ : correlation coefficient;  $R^2$ : explained variance; F: F-test, Sign-test sign of paired observed and estimated departures from their mean on the basis of the number of agreements/disagreements; Product Mean Test (PMT) is the PMT is the product mean T statistics, RMSE: root mean squared error; RE: reduction of error; CE: coefficient of efficiency; DW: Durbin–Watson test; \* $p < 0.05$ , \*\* $p < 0.001$

**Table S4. Correlation among species  $\delta^{13}\text{C}$  chronologies and Mass Balance**

|                    | Correlation Coefficient ( <i>r</i> ) | <i>P</i> value |
|--------------------|--------------------------------------|----------------|
| MB vs. ABPI        | 0.596                                | 2.68e-03       |
| MB vs. PISM        | 0.631                                | 1.25e-03       |
| MB vs. AEIN        | 0.343                                | 1.09e-01       |
| MB vs. ABPI-PISM   | 0.682                                | 3.36e-04       |
| ABPI vs. PISM      | 0.843                                | 1.52e-03       |
| ABPI vs. AEIN      | 0.818                                | 2.69e-02       |
| PISM vs. AEIN      | 0.824                                | 1.37e-04       |
| ABPI vs. ABPI-PISM | 0.881                                | 2.88e-08       |
| PISM vs. ABPI-PISM | 0.919                                | 6.40e-10       |
| AEIN vs. ABPI-PISM | 0.617                                | 1.72e-03       |

(*Abies pindrow*: ABPI; *Picea smithiana*: PISM; *Aesculus indica*: AEIN; Mass Balance: MB).



**Table S5. Correlation between species  $\delta^{13}\text{C}$  chronologies and monthly meteorological data**

| Months        | Temperature ( $^{\circ}\text{C}$ ) |        |        | Months        | Precipitation (mm) |        |        |
|---------------|------------------------------------|--------|--------|---------------|--------------------|--------|--------|
|               | AEIN                               | ABPI   | PISM   |               | AEIN               | ABPI   | PISM   |
| <i>p</i> OCT  | -0.207                             | -0.184 | -0.313 | <i>p</i> OCT  | 0.086              | 0.088  | 0.121  |
| <i>p</i> NOV  | -0.380                             | -0.260 | -0.333 | <i>p</i> NOV  | -0.036             | -0.007 | 0.091  |
| <i>p</i> DEC  | -0.273                             | -0.278 | -0.261 | <i>p</i> DEC  | 0.012              | 0.073  | 0.065  |
| JAN           | -0.053                             | -0.128 | -0.162 | JAN           | 0.119              | 0.262  | 0.141  |
| FEB           | -0.060                             | -0.073 | -0.215 | FEB           | -0.289             | -0.221 | -0.216 |
| MAR           | -0.060                             | -0.053 | -0.168 | MAR           | 0.174              | 0.094  | 0.137  |
| APR           | -0.190                             | -0.079 | -0.292 | APR           | -0.195             | -0.302 | -0.172 |
| MAY           | -0.176                             | -0.008 | -0.144 | MAY           | -0.081             | -0.106 | -0.072 |
| JUN           | 0.1572                             | 0.1691 | 0.109  | JUN           | -0.144             | -0.060 | -0.173 |
| JUL           | -0.119                             | -0.279 | -0.279 | JUL           | 0.149              | 0.390  | 0.206  |
| AUG           | -0.215                             | -0.219 | -0.246 | AUG           | 0.232              | 0.245  | 0.223  |
| SEP           | -0.281                             | -0.131 | -0.292 | SEP           | 0.178              | 0.101  | 0.201  |
| <b>Annual</b> | -0.281                             | -0.215 | -0.405 | <b>Annual</b> | 0.115              | 0.243  | 0.185  |

(*Abies pindrow*: ABPI; *Picea smithiana*: PISM; *Aesculus indica*: AEIN; prefix ‘*p*’ before the months denotes the months of the previous growth year)

**Table S6: Correlation between regional tree-ring  $\delta^{18}\text{O}$  with three species from DOK glacier valley region (Uttarakashi)  $P < 0.05$**

| Uttarakashi                                     | Manali | Jageswar | Humla | Ganesh | Bhutan |
|-------------------------------------------------|--------|----------|-------|--------|--------|
| <i>Abies pindrow</i><br>(Evergreen conifer)     | 0.75   | 0.67     | 0.23  | 0.20   | 0.26   |
| <i>Picea smithiana</i><br>(Evergreen conifer)   | 0.69   | 0.56     | 0.50  | 0.52   | 0.26   |
| <i>Aesculus indica</i><br>(Deciduous broadleaf) | 0.60   | 0.55     | 0.50  | 0.57   | 0.31   |
